# Supplementary material for: Towards social life cycle assessment of food delivery: findings from the Italian case study
Source: Springer Nature journal article supplement (doi:10.1007/s11367-024-02300-2), 2024-04-09
Supplement: MOESM1 [file 26961450]

# **TOWARDS SOCIAL LIFE CYCLE ASSESSMENT OF FOOD DELIVERY: FINDINGS FROM THE ITALIAN CASE STUDY**

**Marco Ruggeri, Mary Giò Zaki and Giuliana Vinci**

Department of Management, Sapienza University of Rome. Via del Castro Laurenziano 9, 00161, Rome

*m.ruggeri@uniroma1.it; marygiò.zaki@uniroma1.it; giuliana.vinci@uniroma1.it*

**Table S1: Sources of the quantitative and qualitative indicators used.**

| Indicators                                                | Source                                                                                                                                                                                                                                                                                                                                                                                                                                                                                                                                                                                                                                                                                                                                                                                                                                                                                                                                                                                                                                                                                                                               | Data type    |
|-----------------------------------------------------------|--------------------------------------------------------------------------------------------------------------------------------------------------------------------------------------------------------------------------------------------------------------------------------------------------------------------------------------------------------------------------------------------------------------------------------------------------------------------------------------------------------------------------------------------------------------------------------------------------------------------------------------------------------------------------------------------------------------------------------------------------------------------------------------------------------------------------------------------------------------------------------------------------------------------------------------------------------------------------------------------------------------------------------------------------------------------------------------------------------------------------------------|--------------|
| % of children in employment, ages 7 - 14                  | <ul style="list-style-type: none"> <li>• Deliveroo: <a href="https://riders.deliveroo.it/it/support/nuovi-riders/per-lavorare-con-deliveroo-e-necessario">https://riders.deliveroo.it/it/support/nuovi-riders/per-lavorare-con-deliveroo-e-necessario</a></li> <li>• Glovo: <a href="https://couriers.glovoapp.com/it/">https://couriers.glovoapp.com/it/</a>;</li> <li>• Just Eat: <a href="https://www.justeat.it/rider?city=roma&amp;utm_source=google&amp;utm_medium=cpc&amp;utm_campaign=RC_S_G_ITA_IT_[SCOOB]_[AOTN]_[COMP]_rome_1008736_[NEW]&amp;utm_content=[COMP]_rome&amp;gad=1&amp;gclid=CjwKC_Ajwh8mlBhB_EiwAsztdBDQhs8c6KpoH44xsh7EWAEu8L61kUTkth-ej7-KAhzKJO2yG4tKcQRoC_KgQAvD_BwE;">https://www.justeat.it/rider?city=roma&amp;utm_source=google&amp;utm_medium=cpc&amp;utm_campaign=RC_S_G_ITA_IT_[SCOOB]_[AOTN]_[COMP]_rome_1008736_[NEW]&amp;utm_content=[COMP]_rome&amp;gad=1&amp;gclid=CjwKC_Ajwh8mlBhB_EiwAsztdBDQhs8c6KpoH44xsh7EWAEu8L61kUTkth-ej7-KAhzKJO2yG4tKcQRoC_KgQAvD_BwE</a>;</li> <li>• Uber Eats: <a href="https://www.uber.com/it/it/deliver/">https://www.uber.com/it/it/deliver/</a></li> </ul> | Quantitative |
| Frequency of Forced labour                                | <ul style="list-style-type: none"> <li>• Global Slavery Index: <a href="https://www.walkfree.org/global-slavery-index/">https://www.walkfree.org/global-slavery-index/</a></li> </ul>                                                                                                                                                                                                                                                                                                                                                                                                                                                                                                                                                                                                                                                                                                                                                                                                                                                                                                                                                | Quantitative |
| Sector average wage per month                             | <ul style="list-style-type: none"> <li>• Assodelivery and UGL: <a href="https://www.bollettinoadapt.it/wp-content/uploads/2020/09/CCNL-Rider-09_09_2020-def.docx.pdf">https://www.bollettinoadapt.it/wp-content/uploads/2020/09/CCNL-Rider-09_09_2020-def.docx.pdf</a>;</li> <li>• Wageindicator.org: <a href="https://wageindicator.org/salary/living-wage/archive-no-index/italy-living-wage-series-september-2019">https://wageindicator.org/salary/living-wage/archive-no-index/italy-living-wage-series-september-2019</a></li> </ul>                                                                                                                                                                                                                                                                                                                                                                                                                                                                                                                                                                                           | Quantitative |
| Hours of work per employee, per week                      | <ul style="list-style-type: none"> <li>• Assodelivery and UGL: <a href="https://www.bollettinoadapt.it/wp-content/uploads/2020/09/CCNL-Rider-09_09_2020-def.docx.pdf">https://www.bollettinoadapt.it/wp-content/uploads/2020/09/CCNL-Rider-09_09_2020-def.docx.pdf</a></li> </ul>                                                                                                                                                                                                                                                                                                                                                                                                                                                                                                                                                                                                                                                                                                                                                                                                                                                    | Quantitative |
| Gender wage gap                                           | <ul style="list-style-type: none"> <li>• Glovo: Social Contribution ESG Report 2021: <a href="https://about.glovoapp.com/wp-content/uploads/2022/12/esg-report-2021.pdf">https://about.glovoapp.com/wp-content/uploads/2022/12/esg-report-2021.pdf</a></li> </ul>                                                                                                                                                                                                                                                                                                                                                                                                                                                                                                                                                                                                                                                                                                                                                                                                                                                                    | Quantitative |
| Fatal accident at workplace                               | <ul style="list-style-type: none"> <li>• ASAPS: <a href="https://www.asaps.it/68306-_osservatorio_rider_food_delivery_elenco_incidenti_aggiornato_al_25_ottobre_201.html">https://www.asaps.it/68306-_osservatorio_rider_food_delivery_elenco_incidenti_aggiornato_al_25_ottobre_201.html</a></li> <li>• AssoDelivery: <a href="https://www.camera.it/application/xmanager/projects/leg18/attachments/upload_file_doc_acquisiti/pdfs/000/002/316/AssoDelivery.pdf">https://www.camera.it/application/xmanager/projects/leg18/attachments/upload_file_doc_acquisiti/pdfs/000/002/316/AssoDelivery.pdf</a></li> </ul>                                                                                                                                                                                                                                                                                                                                                                                                                                                                                                                  | Quantitative |
| Provision of protection for employees                     | <ul style="list-style-type: none"> <li>• Deliveroo: <a href="https://riders.deliveroo.it/it/support/nuovi-riders/per-lavorare-con-deliveroo-e-necessario">https://riders.deliveroo.it/it/support/nuovi-riders/per-lavorare-con-deliveroo-e-necessario</a></li> <li>• Glovo: <a href="https://couriers.glovoapp.com/it/">https://couriers.glovoapp.com/it/</a></li> <li>• Just Eat: <a href="https://www.justeat.it/rider?city=roma&amp;utm_source=google&amp;utm_medium=cpc&amp;utm_campaign=RC_S_G_ITA_IT_[SCOOB]_[AOTN]_[COMP]_rome_1008736_[NEW]&amp;utm_content=[COMP]_rome&amp;gad=1&amp;gclid=CjwKC_Ajwh8mlBhB_EiwAsztdBDQhs8c6KpoH44xsh7EWAEu8L61kUTkth-ej7-KAhzKJO2yG4tKcQRoC_KgQAvD_BwE">https://www.justeat.it/rider?city=roma&amp;utm_source=google&amp;utm_medium=cpc&amp;utm_campaign=RC_S_G_ITA_IT_[SCOOB]_[AOTN]_[COMP]_rome_1008736_[NEW]&amp;utm_content=[COMP]_rome&amp;gad=1&amp;gclid=CjwKC_Ajwh8mlBhB_EiwAsztdBDQhs8c6KpoH44xsh7EWAEu8L61kUTkth-ej7-KAhzKJO2yG4tKcQRoC_KgQAvD_BwE</a></li> <li>• Uber Eats: <a href="https://www.uber.com/it/it/deliver/">https://www.uber.com/it/it/deliver/</a></li> </ul>    | Qualitative  |
| Evidence of violations of laws and employment regulations | <ul style="list-style-type: none"> <li>• ASAPS: <a href="https://www.asaps.it/68306-_osservatorio_rider_food_delivery_elenco_incidenti_aggiornato_al_25_ottobre_201.html">https://www.asaps.it/68306-_osservatorio_rider_food_delivery_elenco_incidenti_aggiornato_al_25_ottobre_201.html</a></li> <li>• AssoDelivery: <a href="https://www.camera.it/application/xmanager/projects/leg18/attachments/upload_file_doc_acquisiti/pdfs/000/002/316/AssoDelivery.pdf">https://www.camera.it/application/xmanager/projects/leg18/attachments/upload_file_doc_acquisiti/pdfs/000/002/316/AssoDelivery.pdf</a></li> </ul>                                                                                                                                                                                                                                                                                                                                                                                                                                                                                                                  | Quantitative |
| Trade union density                                       | <ul style="list-style-type: none"> <li>• ILOSTAT. Trade Union Density: <a href="https://ilostat ilo.org/resources/concepts-and-definitions/description-industrial-relations-data/">https://ilostat ilo.org/resources/concepts-and-definitions/description-industrial-relations-data/</a></li> </ul>                                                                                                                                                                                                                                                                                                                                                                                                                                                                                                                                                                                                                                                                                                                                                                                                                                  | Quantitative |

|                                                                                        |                                                                                                                                                                                                                                                                                                                                                                                                                                                                                                                                                                                                                                                                                                                                                                                                                                                                                                                                                                                                        |              |
|----------------------------------------------------------------------------------------|--------------------------------------------------------------------------------------------------------------------------------------------------------------------------------------------------------------------------------------------------------------------------------------------------------------------------------------------------------------------------------------------------------------------------------------------------------------------------------------------------------------------------------------------------------------------------------------------------------------------------------------------------------------------------------------------------------------------------------------------------------------------------------------------------------------------------------------------------------------------------------------------------------------------------------------------------------------------------------------------------------|--------------|
| Membership in an initiative that promotes social responsibility along the supply chain | <ul style="list-style-type: none"> <li>• Deliveroo. Our path to profitability Annual Report 2022: <a href="https://dpd-12774-s3.s3.eu-west-2.amazonaws.com/assets/8916/7999/4882/deliveroo_plc_Annual_Report_2022.pdf">https://dpd-12774-s3.s3.eu-west-2.amazonaws.com/assets/8916/7999/4882/deliveroo_plc_Annual_Report_2022.pdf</a>;</li> <li>• Glovo. Social Contribution ESG Report 2021: <a href="https://about.glovoapp.com/wp-content/uploads/2022/12/esg-report-2021.pdf">https://about.glovoapp.com/wp-content/uploads/2022/12/esg-report-2021.pdf</a>;</li> <li>• Just Eat. Annual Report 2022: <a href="https://s3.eu-central-1.amazonaws.com/takeaway-corporatewebsite-dev/JET-JV2022-280223_Final-Glossy-AR-2022.pdf">https://s3.eu-central-1.amazonaws.com/takeaway-corporatewebsite-dev/JET-JV2022-280223_Final-Glossy-AR-2022.pdf</a>.</li> <li>• Uber. ESG Reports 2023: <a href="https://www.uber.com/it/it/community/esg/">https://www.uber.com/it/it/community/esg/</a></li> </ul> | Qualitative  |
| Violations of mandator health and safety standards                                     | <ul style="list-style-type: none"> <li>• ASAPS: <a href="https://www.asaps.it/68306-osservatorio_rider_food_delivery_elenco_incidenti_aggiornato_al_25_ottobre_201.html">https://www.asaps.it/68306-osservatorio_rider_food_delivery_elenco_incidenti_aggiornato_al_25_ottobre_201.html</a>;</li> <li>• Istituto Nazionale di Statistica (ISTAT) (2019). Forza lavoro in Italia (2019) <a href="http://dati.istat.it/Index.aspx?DataSetCode=DCCV_FORZLV1">http://dati.istat.it/Index.aspx?DataSetCode=DCCV_FORZLV1</a></li> </ul>                                                                                                                                                                                                                                                                                                                                                                                                                                                                      | Quantitative |
| Presence of management measures to protect consumer health and safety                  | <ul style="list-style-type: none"> <li>• Regulation (EC) No 852/2004 of the European Parliament and of the Council of 29 April 2004 on the hygiene of foodstuffs: <a href="https://eur-lex.europa.eu/legal-content/EN/TXT/?uri=celex%3A32004R0852">https://eur-lex.europa.eu/legal-content/EN/TXT/?uri=celex%3A32004R0852</a></li> </ul>                                                                                                                                                                                                                                                                                                                                                                                                                                                                                                                                                                                                                                                               | Qualitative  |
| Migration workers in food delivery                                                     | <ul style="list-style-type: none"> <li>• Giorgiantonio C, Rizzica L (2018) Il lavoro nella gig economy: Evidenze dal mercato del food delivery in Italia. Questioni di Economia e Finanza Numero 472, Banca d'Italia <a href="https://www.bancaditalia.it/pubblicazioni/qef/2018-0472/OEF_472_18.pdf">https://www.bancaditalia.it/pubblicazioni/qef/2018-0472/OEF_472_18.pdf</a></li> </ul>                                                                                                                                                                                                                                                                                                                                                                                                                                                                                                                                                                                                            | Quantitative |

**Table S2. Quantitative indicators: value, reference scale and performance reference points (Adapted by Gompf et al., 2022). Reference scale and performance reference point are from Eisfeldt and Ciroth (2020)**

| Categories                    | Subcategories                                             | Indicators                                      | Value    | Reference scale and performance reference point (Eisfeldt and Ciroth, 2020) |                                   |                                 |                                |                               |                   |
|-------------------------------|-----------------------------------------------------------|-------------------------------------------------|----------|-----------------------------------------------------------------------------|-----------------------------------|---------------------------------|--------------------------------|-------------------------------|-------------------|
|                               |                                                           |                                                 |          | No risk                                                                     | Very low risk                     | Low risk                        | Medium risk                    | High risk                     | Very high risk    |
|                               |                                                           |                                                 |          | 0                                                                           | 1                                 | 2                               | 3                              | 4                             | 5                 |
| <b>WORKERS</b>                |                                                           |                                                 |          |                                                                             |                                   |                                 |                                |                               |                   |
| Child labour                  | Children in employment                                    | % of children in employment ages 7-14           | 0        | 0                                                                           | $0 < y < 2.5$                     | $2.5 \leq y < 5$                | $5 \leq y < 10$                | $10 \leq y < 20$              | $20 \leq y$       |
| Forced labour                 | Frequency of forced labour                                | Cases of forced labour x 1000 employees         | 2.43     | 0                                                                           | $0 < y < 4$                       | $4 \leq y < 8$                  | $8 \leq y < 12$                | $12 \leq y < 16$              | $16 \leq y$       |
| Fair salary                   | Sector average wage per month                             | Score                                           | 1.14     | 0                                                                           | $2.5 \leq y$                      | $2 \leq y < 2.5$                | $1.5 \leq y < 2$               | $1 \leq y < 1.5$              | $0 < y < 1$       |
| Working time                  | Hours of work per employee, per week                      | hours                                           | 30       | 0                                                                           | -                                 | $40 \leq y < 48$                | $30 \leq y < 40$               | $20 \leq y < 30$              | $y \leq 20$       |
| Discrimination                | Gender wage gap                                           | %                                               | 24.05    | 0                                                                           | $0 < y < 5$                       | $5 \leq y < 10$                 | $10 \leq y < 20$               | $20 \leq y < 30$              | $30 \leq y$       |
| Health and Safety             | Fatal accident at the workplace                           | Cases x 100,000 employees                       | 17       | 0                                                                           | $0 \leq y < 7.5$                  | $7.5 \leq y < 15$               | $15 \leq y < 25$               | $25 \leq y < 40$              | $40 \leq y$       |
| Social benefits, legal issues | Evidence of violations of laws and employment regulations | Cases of injuries x 1,000 employees             | 1.1      | 0                                                                           | $0.1 > y$                         | $0.1 \leq y < 1$                | $1 \leq y < 10$                | $10 \leq y < 100$             | $100 < y$         |
| Workers right                 | Trade union density                                       | %                                               | 32.5     | 0                                                                           | $80 < y$                          | $60 < y \leq 80$                | $40 < y \leq 60$               | $20 < y \leq 40$              | $20 \geq y$       |
| <b>SOCIETY</b>                |                                                           |                                                 |          |                                                                             |                                   |                                 |                                |                               |                   |
| Health and Safety             | Violations of mandatory health and safety standards       | Cases of violation relative to the labour force | 0.000001 | 0                                                                           | $0.000000055 \leq y < 0.00000025$ | $0.00000025 \leq y < 0.0000008$ | $0.0000008 \leq y < 0.0000015$ | $0.0000015 \leq y < 0.000005$ | $0.000005 \leq y$ |
| <b>LOCAL COMMUNITY</b>        |                                                           |                                                 |          |                                                                             |                                   |                                 |                                |                               |                   |
| Migration                     | Migrant workers in food delivery                          | % of total workers in the sector                | 23%      | 0                                                                           | $0 < y < 2.5$                     | $2.5 \leq y < 5$                | $5 \leq y < 10$                | $10 \leq y < 20$              | $20 \leq y$       |
